# Supplementary material for: Association Between Subclinical Thyroid Dysfunction and Fracture Risk
Source: PubMed Central journal article supplement (PMC9644261; doi:10.1001/jamanetworkopen.2022.40823), 2022-11-08
Supplement: jamanetwopen-e2240823-s001.pdf [file jamanetwopen-e2240823-s001.pdf]

## Supplementary Online Content

Daya NR, Fretz A, Martin SS, et al. Association between subclinical thyroid dysfunction and fracture risk. *JAMA Netw Open*. 2022;5(11):e2240823.  
doi:10.1001/jamanetworkopen.2022.40823

**eTable 1.** Breakdown and *ICD-9* Codes for Different Types and Locations of Fractures (n=3,556)

**eTable 2.** Adjusted Hazard Ratios for Fracture Types by Categories of Thyroid Dysfunction at Baseline

**eTable 3.** Mortality Rate of Death by Categories of Thyroid Dysfunction at Baseline

**eTable 4.** Adjusted Subhazard Ratios for Fracture, Incorporating the Competing Risk of Death

**eTable 5.** Adjusted Hazard Ratios for Fracture by Categories of Thyroid Dysfunction at Baseline, Stratified by Race, Age, and Sex

**eTable 6.** Adjusted Hazard Ratios for Fracture by Categories of Thyroid Dysfunction and Thyroid Medication Users at Baseline

**eTable 7.** Adjusted Hazard Ratios for Inpatient Fracture by Categories of Thyroid Dysfunction at Baseline

**eTable 8.** Adjusted Hazard Ratios for Fracture, Excluding Pathologic Fractures (n=427)

**eTable 9.** Adjusted Hazard Ratios (95% CI) for Fracture by Categories of Thyroid Dysfunction at Baseline, Using Time-Varying Covariates

**eTable 10.** Adjusted Hazard Ratios for Fracture by Categories of Subclinical Thyroid Dysfunction at Baseline and Incident Clinical Thyroid Dysfunction

**eFigure.** Adjusted Cumulative Incidence of Fracture by Categories of Thyroid Dysfunction, Accounting for the Competing Risk of Death

This supplementary material has been provided by the authors to give readers additional information about their work.

**eTable 1.** Breakdown and *ICD-9* Codes for Different Types and Locations of Fractures (n=3,556)

| Type                | ICD-9 code                                                        | n (% of fractures) |
|---------------------|-------------------------------------------------------------------|--------------------|
| <b>Pathological</b> | 733.10-733.19                                                     | 427 (12.0%)        |
| <b>Stress</b>       | 733.93-733.98                                                     | 36 (1.0%)          |
| <b>Injury</b>       | 800-829                                                           | 3,254 (91.5%)      |
|                     |                                                                   |                    |
| Location            | ICD-9 code                                                        | n (% of fractures) |
| <b>Hip</b>          | 820-820.9                                                         | 502 (14.1%)        |
| <b>Spine</b>        | 733.13; 805.2-805.5; 806.2-806.5                                  | 492 (13.8%)        |
| <b>Non-spine</b>    | Any fracture claims that do not contain the ICD-9 codes for spine | 3,064 (86.2%)      |

**eTable 2.** Adjusted Hazard Ratios for Fracture Types by Categories of Thyroid Dysfunction at Baseline

|                                                        | <b>Subclinical Hypothyroidism</b> | <b>Euthyroidism</b>  | <b>Subclinical Hyperthyroidism</b> |
|--------------------------------------------------------|-----------------------------------|----------------------|------------------------------------|
| <b>N hip fractures</b>                                 | 24                                | 465                  | 13                                 |
| <b>IR<sup>a</sup> (95% CI) per 10,000 person-years</b> | 25.7 (17.2, 38.3)                 | 23.4 (21.4, 25.7)    | 26.1 (15.2, 45.0)                  |
| <b>Model 1<sup>b</sup></b>                             | 1.25 (0.83, 1.89)                 | 1 (Reference)        | 1.97 (1.00, 3.88)                  |
| <b>Model 2<sup>c</sup></b>                             | 1.28 (0.84, 1.93)                 | 1 (Reference)        | 1.91 (0.96, 3.79)                  |
| <b>N spine fractures</b>                               | 18                                | 461                  | 13                                 |
| <b>IR<sup>a</sup> (95% CI) per 10,000 person-years</b> | 19.3 (12.1, 30.6)                 | 23.2 (21.2, 25.5)    | 26.1 (15.2, 45.0)                  |
| <b>Model 1<sup>b</sup></b>                             | 1.67 (1.04, 2.67)                 | 1 (Reference)        | 2.64 (1.29, 5.42)                  |
| <b>Model 2<sup>c</sup></b>                             | 1.59 (0.99, 2.56)                 | 1 (Reference)        | 2.18 (1.06, 4.49)                  |
| <b>N non-spine fractures</b>                           | 151                               | 2,830                | 83                                 |
| <b>IR<sup>a</sup> (95% CI) per 10,000 person-years</b> | 161.6 (137.7, 189.5)              | 142.6 (137.5, 148.0) | 166.6 (134.4, 206.6)               |
| <b>Model 1<sup>b</sup></b>                             | 1.09 (0.92, 1.28)                 | 1 (Reference)        | 1.52 (1.16, 2.00)                  |
| <b>Model 2<sup>c</sup></b>                             | 1.06 (0.90, 1.25)                 | 1 (Reference)        | 1.42 (1.08, 1.86)                  |

<sup>a</sup> IR: Incidence rate

<sup>b</sup> Model 1: age, sex, race/center

<sup>c</sup> Model 2: Model 1 + diabetes, HDL cholesterol, antihypertensive treatment, heart rate, BMI, smoking status, alcohol consumption, physical activity, menopause, and Vitamin D level

**eTable 3.** Mortality Rate of Death by Categories of Thyroid Dysfunction at Baseline

|                                    | <b>n deaths/N</b> | <b>Mortality rate (95% CI) per 1,000 person-years</b> |
|------------------------------------|-------------------|-------------------------------------------------------|
| <b>Subclinical Hypothyroidism</b>  | 235/484           | 20.8 (18.3, 23.7)                                     |
| <b>Euthyroidism</b>                | 5,193 /10,177     | 22.2 (21.6, 22.8)                                     |
| <b>Subclinical Hyperthyroidism</b> | 165/285           | 27.3 (23.4, 31.8)                                     |

**eTable 4.** Adjusted<sup>a</sup> Subhazard Ratios for Fracture, Incorporating the Competing Risk of Death

|                                    | <b>sHR (95% CI)</b> |
|------------------------------------|---------------------|
| <b>Subclinical Hypothyroidism</b>  | 1.09 (0.93, 1.28)   |
| <b>Euthyroidism</b>                | 1 (Reference)       |
| <b>Subclinical Hyperthyroidism</b> | 1.33 (1.02, 1.73)   |

<sup>a</sup>Adjusted for age, sex, race/center, diabetes, HDL cholesterol, antihypertensive treatment, heart rate, BMI, smoking status, alcohol consumption, physical activity, menopause, and Vitamin D level

**eTable 5.** Adjusted Hazard Ratios for Fracture by Categories of Thyroid Dysfunction at Baseline, Stratified by Race, Age, and Sex

|                                                  |                                   |                      |                                    |
|--------------------------------------------------|-----------------------------------|----------------------|------------------------------------|
| <b>Black individuals</b>                         | <b>Subclinical Hypothyroidism</b> | <b>Euthyroidism</b>  | <b>Subclinical Hyperthyroidism</b> |
| n/N                                              | 11/52                             | 546/2,441            | 45/133                             |
| IR (95% CI) per 10,000 person-years <sup>a</sup> | 132.7 (73.5, 239.7)               | 117.7 (108.3, 128.0) | 201.9 (150.7, 270.4)               |
| Model 1 <sup>b</sup>                             | 0.87 (0.48, 1.58)                 | 1 (Reference)        | 1.83 (1.35, 2.49)                  |
| Model 2 <sup>c</sup>                             | 0.91 (0.50, 1.66)                 | 1 (Reference)        | 1.73 (1.27, 2.36)                  |
| <b>White individuals<sup>d</sup></b>             | <b>Subclinical Hypothyroidism</b> | <b>Euthyroidism</b>  | <b>Subclinical Hyperthyroidism</b> |
| n/N                                              | 158/432                           | 2,745/7,736          | 51/152                             |
| IR (95% CI) per 10,000 person-years <sup>a</sup> | 186.8 (159.9, 218.3)              | 181.4 (174.8, 188.3) | 185.4 (140.9, 243.9)               |
| Model 1 <sup>b</sup>                             | 0.86 (0.73, 1.01)                 | 1 (Reference)        | 1.20 (0.91, 1.58)                  |
| Model 2 <sup>c</sup>                             | 0.88 (0.75, 1.04)                 | 1 (Reference)        | 1.12 (0.85, 1.48)                  |
| <b>60 years +</b>                                | <b>Subclinical Hypothyroidism</b> | <b>Euthyroidism</b>  | <b>Subclinical Hyperthyroidism</b> |
| n/N                                              | 91/215                            | 1,447/3,502          | 43/90                              |
| IR (95% CI) per 10,000 person-years <sup>a</sup> | 261.9 (213.3, 321.7)              | 264.2 (250.9, 278.2) | 379.9 (281.8, 512.3)               |
| Model 1 <sup>b</sup>                             | 0.88 (0.71, 1.09)                 | 1 (Reference)        | 1.73 (1.27, 2.35)                  |
| Model 2 <sup>c</sup>                             | 0.88 (0.71, 1.10)                 | 1 (Reference)        | 1.63 (1.19, 2.21)                  |
| <b>Less than 60 years<sup>e</sup></b>            | <b>Subclinical Hypothyroidism</b> | <b>Euthyroidism</b>  | <b>Subclinical Hyperthyroidism</b> |
| n/N                                              | 78/269                            | 1,844/6,675          | 53/195                             |
| IR (95% CI) per 10,000 person-years <sup>a</sup> | 132.8 (106.4, 165.9)              | 128.3 (122.6, 134.3) | 137.7 (105.2, 180.3)               |
| Model 1 <sup>b</sup>                             | 0.86 (0.69, 1.09)                 | 1 (Reference)        | 1.25 (0.95, 1.64)                  |
| Model 2 <sup>c</sup>                             | 0.89 (0.71, 1.12)                 | 1 (Reference)        | 1.18 (0.89, 1.55)                  |
| <b>Female</b>                                    | <b>Subclinical Hypothyroidism</b> | <b>Euthyroidism</b>  | <b>Subclinical Hyperthyroidism</b> |
| n/N                                              | 123/305                           | 2,069/5,476          | 64/158                             |
| IR (95% CI) per 10,000 person-years <sup>a</sup> | 206.0 (172.7, 245.9)              | 191.5 (183.4, 199.9) | 223.2 (174.7, 285.2)               |
| Model 1 <sup>b</sup>                             | 0.89 (0.74, 1.07)                 | 1 (Reference)        | 1.49 (1.16, 1.92)                  |
| Model 2 <sup>c</sup>                             | 0.90 (0.75, 1.09)                 | 1 (Reference)        | 1.38 (1.07, 1.77)                  |
| <b>Male<sup>f</sup></b>                          | <b>Subclinical Hypothyroidism</b> | <b>Euthyroidism</b>  | <b>Subclinical Hyperthyroidism</b> |
| n/N                                              | 46/179                            | 1,222/4,701          | 32/127                             |
| IR (95% CI) per 10,000 person-years <sup>a</sup> | 136.3 (102.1, 181.9)              | 135.2 (127.8, 143.0) | 151.4 (107.1, 214.1)               |

|                      |                   |               |                   |
|----------------------|-------------------|---------------|-------------------|
| Model 1 <sup>b</sup> | 0.81 (0.60, 1.09) | 1 (Reference) | 1.29 (0.91, 1.84) |
| Model 2 <sup>c</sup> | 0.86 (0.64, 1.16) | 1 (Reference) | 1.26 (0.88, 1.79) |

<sup>a</sup>IR: Incidence rate

<sup>b</sup> Model 1: age, race/center, sex

<sup>c</sup> Model 2: Model 1 + diabetes, HDL cholesterol, antihypertensive treatment, heart rate, BMI, smoking status, alcohol consumption, physical activity, menopause, and Vitamin D level

<sup>d</sup> p-value for interaction between thyroid category and race = 0.117

<sup>e</sup> p-value for interaction between thyroid category and age = 0.178

<sup>f</sup> p-value for interaction between thyroid category and sex = 0.773

**eTable 6.** Adjusted Hazard Ratios for Fracture by Categories of Thyroid Dysfunction and Thyroid Medication Users at Baseline

|                                                  | <b>Subclinical Hypothyroidism</b> | <b>Euthyroidism</b>  | <b>Subclinical Hyperthyroidism</b> | <b>Thyroid Medication Users</b> |
|--------------------------------------------------|-----------------------------------|----------------------|------------------------------------|---------------------------------|
| n/N                                              | 169/484                           | 3,291/10,177         | 96/285                             | 281/662                         |
| IR (95% CI) per 10,000 person-years <sup>a</sup> | 182.0 (156.5, 211.6)              | 166.5 (160.9, 172.3) | 192.8 (157.8, 235.4)               | 230.6 (205.2, 259.2)            |
| Model 1 <sup>b</sup>                             | 0.88 (0.75, 1.02)                 | 1 (Reference)        | 1.41 (1.15, 1.73)                  | 1.13 (1.00, 1.28)               |
| Model 2 <sup>c</sup>                             | 0.90 (0.77, 1.05)                 | 1 (Reference)        | 1.33 (1.08, 1.63)                  | 1.12 (0.99, 1.27)               |

<sup>a</sup>IR: Incidence rate

<sup>b</sup>Model 1: age, race/center, sex

<sup>c</sup>Model 2: Model 1 + diabetes, HDL cholesterol, antihypertensive treatment, heart rate, BMI, smoking status, alcohol consumption, physical activity, menopause, and Vitamin D level



**eTable 7.** Adjusted Hazard Ratios for Inpatient Fracture<sup>a</sup> by Categories of Thyroid Dysfunction at Baseline

| <b>Overall<br/>(n=10,965)</b> | <b>Subclinical<br/>Hypothyroidism</b> | <b>Euthyroidism</b> | <b>Subclinical<br/>Hyperthyroidism</b> |
|-------------------------------|---------------------------------------|---------------------|----------------------------------------|
| n/N                           | 77/488                                | 1,680/10,191        | 54/286                                 |
| Model 1 <sup>b</sup>          | 0.73 (0.58, 0.92)                     | 1 (Reference)       | 1.66 (1.26, 2.18)                      |
| Model 2 <sup>c</sup>          | 0.76 (0.60, 0.95)                     | 1 (Reference)       | 1.54 (1.17, 2.03)                      |

<sup>a</sup> Hospitalized Inpatient Fracture using ARIC Data and CMS Data, n=1,809 fractures

<sup>b</sup> Model 1: age, race/center, sex

<sup>c</sup> Model 2: Model 1 + diabetes, HDL cholesterol, antihypertensive treatment, heart rate, BMI, smoking status, alcohol consumption, physical activity, menopause, and Vitamin D level

**eTable 8.** Adjusted Hazard Ratios for Fracture, Excluding Pathologic Fractures (n=427)

| <b>Overall<br/>(n=10,519)</b> | <b>Subclinical<br/>Hypothyroidism</b> | <b>Euthyroidism</b> | <b>Subclinical<br/>Hyperthyroidism</b> |
|-------------------------------|---------------------------------------|---------------------|----------------------------------------|
| <b>n/N</b>                    | 151/466                               | 2,893/9,779         | 85/274                                 |
| Model 1 <sup>a</sup>          | 0.88 (0.74, 1.03)                     | 1 (Reference)       | 1.43 (1.15, 1.77)                      |
| Model 2 <sup>b</sup>          | 0.90 (0.76, 1.06)                     | 1 (Reference)       | 1.36 (1.10, 1.69)                      |

<sup>a</sup>Model 1: age, race/center, sex

<sup>b</sup>Model 2: Model 1 + diabetes, HDL cholesterol, antihypertensive treatment, heart rate, BMI, smoking status, alcohol consumption, physical activity, menopause, and Vitamin D level

**eTable 9.** Adjusted Hazard Ratios (95% CI) for Fracture by Categories of Thyroid Dysfunction at Baseline, Using Time-Varying Covariates

| <b>Overall (n=10,946)</b> | <b>Subclinical Hypothyroidism</b> | <b>Euthyroidism</b> | <b>Subclinical Hyperthyroidism</b> |
|---------------------------|-----------------------------------|---------------------|------------------------------------|
| <b>n/N</b>                | 169/484                           | 3,291/10,177        | 96/285                             |
| Model 2 <sup>a</sup>      | 0.90 (0.77, 1.05)                 | 1 (Reference)       | 1.34 (1.09, 1.65)                  |
| Model 2b <sup>b</sup>     | 0.88 (0.75, 1.02)                 | 1 (Reference)       | 1.37 (1.12, 1.68)                  |

<sup>a</sup> Model 2: age, sex, race/center diabetes, HDL cholesterol, antihypertensive treatment, heart rate, BMI, smoking status, alcohol consumption, physical activity, menopause, and Vitamin D level

<sup>a</sup> Model 2b: age, sex, race/center, heart rate, menopause, and Vitamin D level; **time-varying:** diabetes, HDL cholesterol, antihypertensive treatment, BMI, smoking status, alcohol consumption, and physical activity

**eTable 10.** Adjusted Hazard Ratios for Fracture by Categories of Subclinical Thyroid Dysfunction at Baseline and Incident Clinical Thyroid Dysfunction

|                                                        | <b>Subclinical Hypothyroidism</b> | <b>Euthyroidism</b>  | <b>Subclinical Hyperthyroidism</b> | <b>Incident clinical thyroid dysfunction<sup>a</sup></b> |
|--------------------------------------------------------|-----------------------------------|----------------------|------------------------------------|----------------------------------------------------------|
| <b>n fractures</b>                                     | 118                               | 3,074                | 79                                 | 285                                                      |
| <b>IR (95% CI) per 10,000 person-years<sup>b</sup></b> | 168.5 (140.7, 201.8)              | 162.9 (157.3, 168.8) | 175.1 (140.5, 218.3)               | 226.6 (201.8, 254.5)                                     |
| <b>Model 1<sup>c</sup></b>                             | 0.89 (0.74, 1.07)                 | 1 (Reference)        | 1.36 (1.09, 1.70)                  | 0.94 (0.83, 1.06)                                        |
| <b>Model 2<sup>d</sup></b>                             | 0.92 (0.76, 1.11)                 | 1 (Reference)        | 1.29 (1.03, 1.61)                  | 0.93 (0.82, 1.05)                                        |

<sup>a</sup> Modeled as a time-varying exposure

<sup>b</sup> IR: Incidence rate

<sup>c</sup> Model 1: age, sex, race/center

<sup>d</sup> Model 2: Model 1 + diabetes, HDL cholesterol, antihypertensive treatment, heart rate, BMI, smoking status, alcohol consumption, physical activity, menopause, and Vitamin D level

**eFigure.** Adjusted<sup>a</sup> Cumulative Incidence of Fracture by Categories of Thyroid Dysfunction, Accounting for the Competing Risk of Death

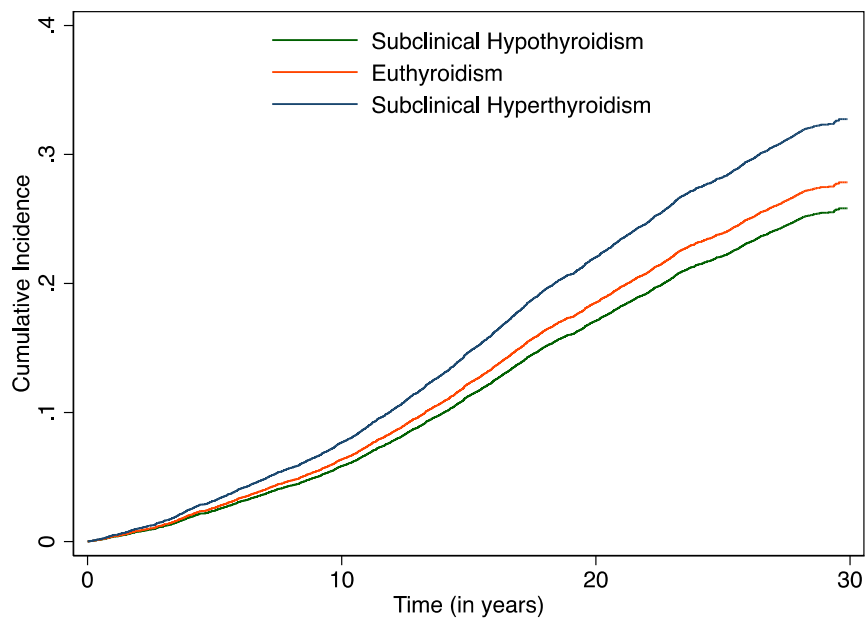

<sup>a</sup>Adjusted for age, sex, race/center, diabetes, HDL cholesterol, antihypertensive treatment, heart rate, BMI, smoking status, alcohol consumption, physical activity, menopause, and Vitamin D level
